# Supplementary material for: Air-sea gas exchange measurements helped derive in-situ organic and inorganic carbon fixation in response to Ocean Alkalinity Enhancement in a temperate plankton community
Source: Copernicus journal article supplement (doi:10.5194/egusphere-2025-524), 2025-02-28
Supplement: Supplementary file 1 [file egusphere-2025-524-supplement.pdf]

1 **CONTENTS**

2 Figure S1: Temporal development of environmental conditions

3 Figure S2: pH correction/calibration

4 Figure S3: N<sub>2</sub>O measured concentrations and chemical enhancement

5 Figure S4: Net community production-related figures

6 Figure S5: Calcification related figures

7

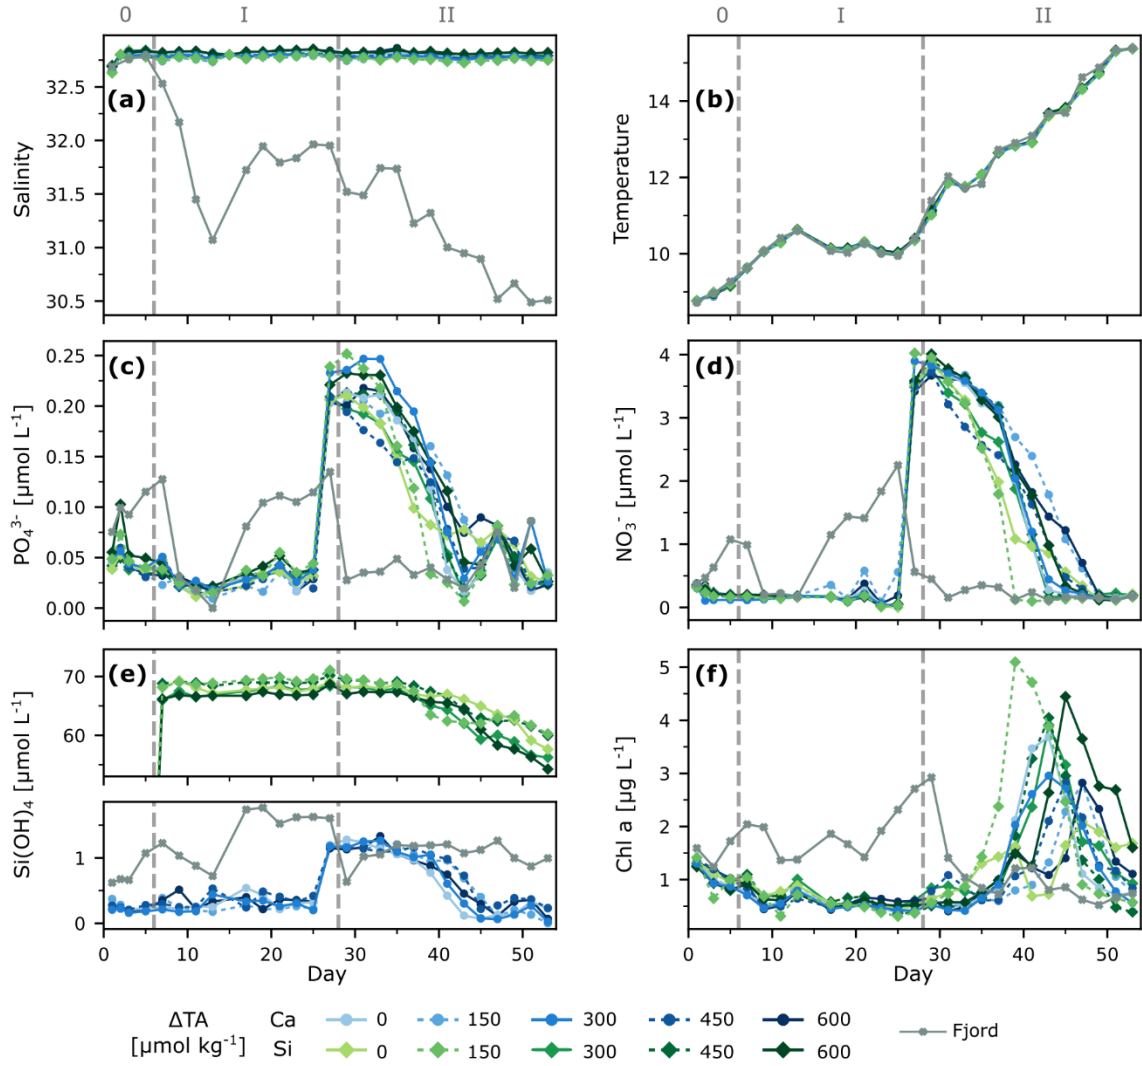

8

9

10 **Figure S1: Temporal development of environmental conditions of the enclosed water masses and the Fjord at the**  
 11 **mooring site.** Water column averaged salinity (a) and temperature (b) over time obtained from CTD casts, and (c, d, e, f)  
 12 laboratory nutrient and Chl *a* measurements of depth integrated water samples. Dashed lines and roman numbers denote the pre-treatment (0) phase and phases before (I) and after (II) nutrient addition.

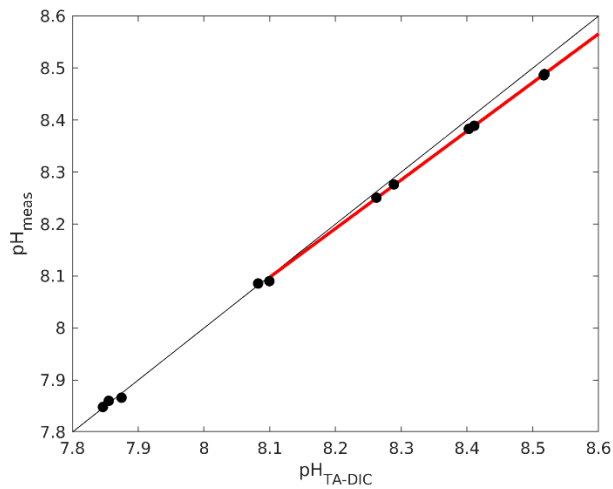

13

14 **Figure S2: Measured pH vs pH derived from measurements of TA and DIC.** The obtained linearity was used to recalibrate  
 15 measurements.  
 16

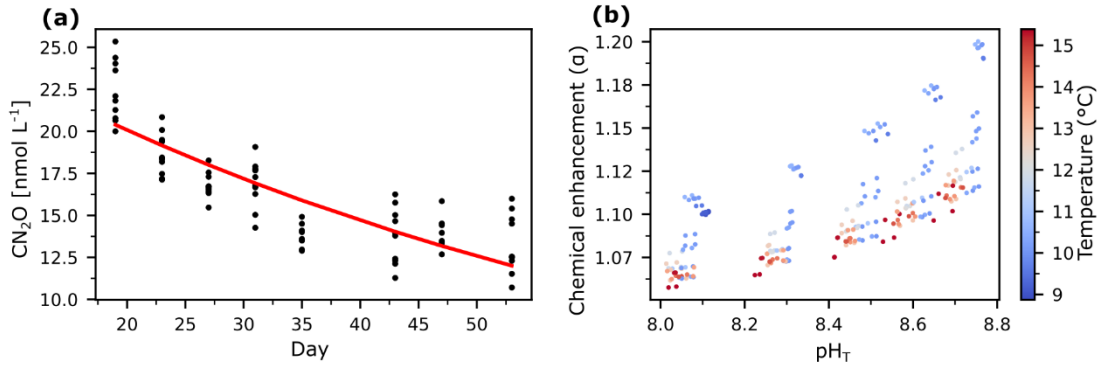

17  
 18 **Figure S3: Measured N<sub>2</sub>O concentrations during the experiment (a), and chemical enhancement according to Hover and**  
 19 **Berkshire (1969) calculated for measured k, S, T and pH<sub>T</sub> (b).**

20  
 21

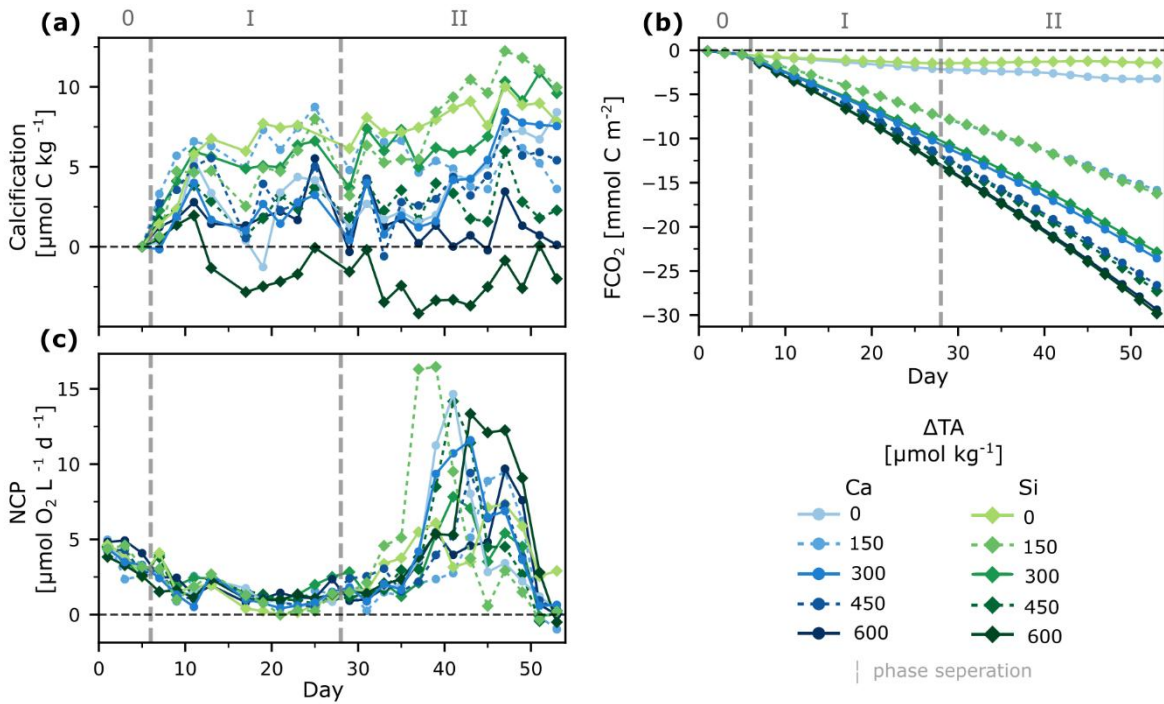

22  
 23 **Figure S4: Cumulative calcification (a), cumulative FCO<sub>2</sub> (b), and net community production (NCP) obtained from O<sub>2</sub>**  
 24 **measurements – re-fitted from Marín-Samper et al., 2024 (c) over time.**

25

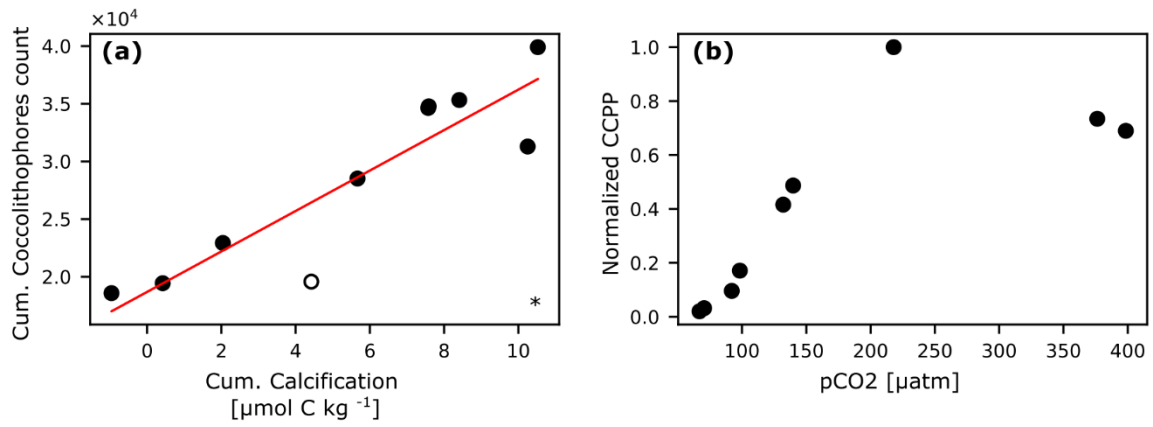

26

27 **Figure S5: Calculations supporting calcification estimates.** Cumulative coccolithophore counts ( $\text{cells mL}^{-1}$ ) from flow  
 28 cytometry measurements (Cytosense, CytoBuoy, Netherlands) vs estimated cumulative calcification (a), and normalized  
 29 cumulative  $\text{CaCO}_3$  production potential (CCPP) vs  $\text{pCO}_2$  (b). The hollow circle has been excluded from analysis. \*  $p < 0.05$ .

30
